# Supplementary material for: Osteonecrosis of the Femoral Head: A Multidisciplinary Approach in Diagnostic Accuracy
Source: MDPI journal article supplement (doi:10.3390/diagnostics12071731), 2022-07-16
Supplement: s1 [file s1]

# Supplementary Table S1.

**Supplementary Table S1.** Anatomopathological exam from selected bone samples. Femoral head specimens underwent histological analysis pondering: the average percentage of empty osteocyte lacunae (at least 300 lacunae were quantified in four non-overlapping regions of interest) and the presence/absence of heterotopic ossification (dystrophic calcification present in H&E staining). Fatty infiltration and medullary fibrosis were graded in qualitative manner ("1-absence", "2-presence", "3-moderate", and "4-intense"), being assessed by H&E and Masson trichrome staining respectively. A statistically significant difference in the number of empty osteocytic lacunae ( $t=5.13$ ;  $p<0.05$ ) was found between the ONFH (mean  $\pm$  SE =  $68,16 \pm 10,57$ ) and the OA group (mean  $\pm$  SE =  $40,91 \pm 15,03$ ). There was also a statistically significant difference ( $U=35$ ;  $p<0.05$ ) between medullary fibrosis presence in the ONFH (mean  $\pm$  SE =  $2,75 \pm 1,21$ ) and the OA (mean  $\pm$  SE =  $1,66 \pm 0,98$ ) group. Fatty infiltration and heterotopic ossification showed no statistically significant differences between both groups.

| Specimen     | Empty lacunae (%) | Fatty Infiltration (1-4) | Heterotopic Ossification (presence) | Fibrosis (1-4) |
|--------------|-------------------|--------------------------|-------------------------------------|----------------|
| 1 (CASE)     | 64                | 4                        | NO                                  | 4              |
| 2 (CASE)     | 75                | 4                        | NO                                  | 2              |
| 3 (CASE)     | 57                | 4                        | NO                                  | 1              |
| 4 (CASE)     | 80                | 4                        | NO                                  | 4              |
| 5 (CASE)     | 73                | 4                        | NO                                  | 4              |
| 6 (CASE)     | 71                | 2                        | NO                                  | 1              |
| 7 (CASE)     | 74                | 4                        | NO                                  | 2              |
| 8 (CASE)     | 70                | 2                        | YES                                 | 3              |
| 9 (CASE)     | 42                | 4                        | NO                                  | 2              |
| 10 (CASE)    | 63                | 2                        | NO                                  | 2              |
| 11 (CASE)    | 70                | 4                        | YES                                 | 4              |
| 12 (CASE)    | 79                | 4                        | YES                                 | 4              |
| 13 (CONTROL) | 61                | 2                        | NO                                  | 2              |
| 14 (CONTROL) | 47                | 3                        | NO                                  | 1              |
| 15 (CONTROL) | 40                | 2                        | NO                                  | 1              |
| 16 (CONTROL) | 44                | 4                        | YES                                 | 4              |
| 17 (CONTROL) | 47                | 2                        | NO                                  | 1              |
| 18 (CONTROL) | 54                | 3                        | NO                                  | 1              |
| 19 (CONTROL) | 25                | 4                        | NO                                  | 1              |
| 20 (CONTROL) | 41                | 3                        | YES                                 | 3              |
| 21 (CONTROL) | 47                | 3                        | NO                                  | 1              |
| 22 (CONTROL) | 52                | 2                        | NO                                  | 1              |
| 23 (CONTROL) | 27                | 4                        | YES                                 | 2              |
| 24 (CONTROL) | 6                 | 2                        | NO                                  | 2              |
